# Supplementary material
Source: PubMed Central journal article supplement (PMC7518220)
Supplement: NIHMS1535435-supplement-1.pdf [file NIHMS1535435-supplement-1.pdf]

| LOT-R Item | Timepoint | N   | Proportion with same score on original and modified LOT-R (%) |
|------------|-----------|-----|---------------------------------------------------------------|
| Item #1    | Baseline  | 125 | 48.8                                                          |
|            | 8 weeks   | 90  | 57.8                                                          |
|            | 16 weeks  | 84  | 70.2                                                          |
| Item #2    | Baseline  | 125 | 44.8                                                          |
|            | 8 weeks   | 91  | 61.5                                                          |
|            | 16 weeks  | 84  | 64.3                                                          |
| Item #3    | Baseline  | 125 | 48.8                                                          |
|            | 8 weeks   | 91  | 63.7                                                          |
|            | 16 weeks  | 84  | 67.9                                                          |
| Item #4    | Baseline  | 125 | 56.8                                                          |
|            | 8 weeks   | 91  | 61.5                                                          |
|            | 16 weeks  | 84  | 70.2                                                          |
| Item #5    | Baseline  | 125 | 55.2                                                          |
|            | 8 weeks   | 91  | 59.3                                                          |
|            | 16 weeks  | 84  | 70.2                                                          |
| Item #6    | Baseline  | 125 | 61.6                                                          |
|            | 8 weeks   | 91  | 78.0                                                          |
|            | 16 weeks  | 84  | 76.2                                                          |

**Supplementary Table 1.** Rates of identical item scores between the two LOT-R measures (N=125 at baseline, n=91 at 8 weeks, n=84 at 16 weeks).

|                                            | Original LOT-R | Modified LOT-R | p     |
|--------------------------------------------|----------------|----------------|-------|
| SD of change between baseline and 8 weeks  |                |                |       |
| Item #1                                    | 1.28           | 1.03           | 0.044 |
| Item #2                                    | 1.46           | 1.42           | 0.75  |
| Item #3                                    | 1.57           | 1.17           | 0.002 |
| Item #4                                    | 1.20           | 1.22           | 0.86  |
| Item #5                                    | 1.32           | 1.36           | 0.77  |
| Item #6                                    | 0.96           | 1.08           | 0.24  |
| Total                                      | 5.12           | 4.10           | 0.012 |
| SD of change between baseline and 16 weeks |                |                |       |
| Item #1                                    | 1.31           | 1.06           | 0.043 |
| Item #2                                    | 1.75           | 1.59           | 0.37  |
| Item #3                                    | 1.32           | 1.13           | 0.12  |
| Item #4                                    | 1.35           | 1.26           | 0.48  |
| Item #5                                    | 1.31           | 1.39           | 0.58  |
| Item #6                                    | 1.12           | 0.94           | 0.086 |
| Total                                      | 4.99           | 4.71           | 0.54  |

**Supplementary Table 2.** Intraindividual variance in item responses across time points on the original and modified LOT-R. Pitman's test for equality of correlated variances was used to calculate the reported p-values.

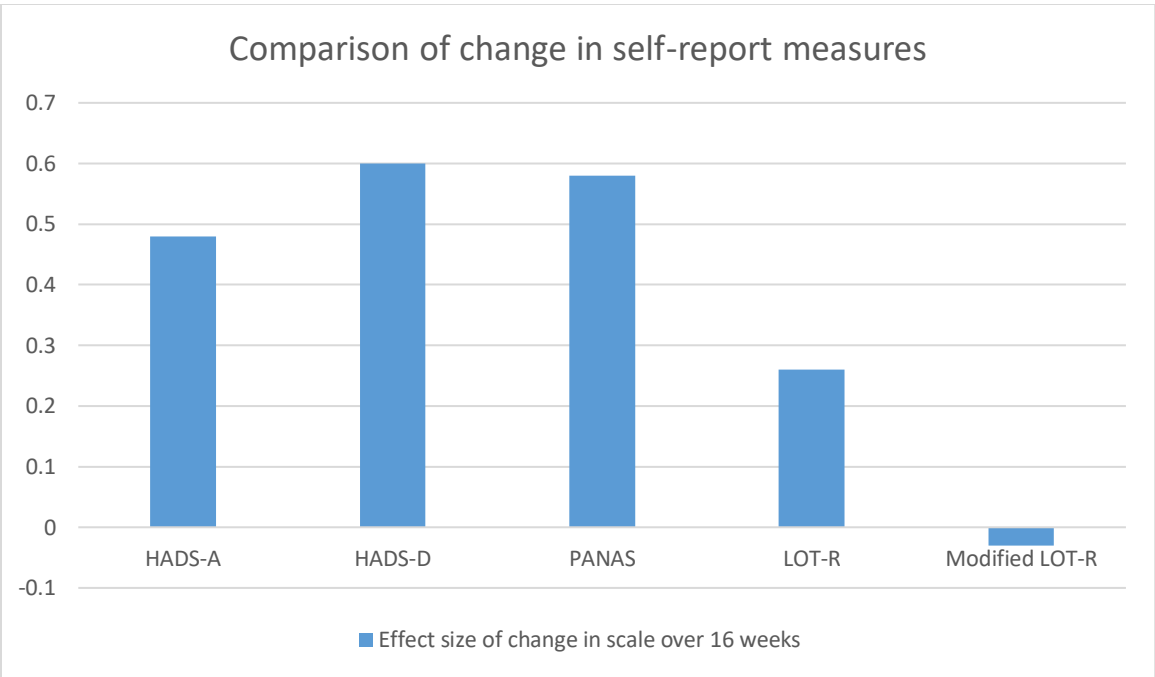

**Supplementary Figure 1.** Comparison of change in self-report measures.
